# Supplementary material
Source: PubMed Central journal article supplement (PMC6128698)

Fig. 1

b

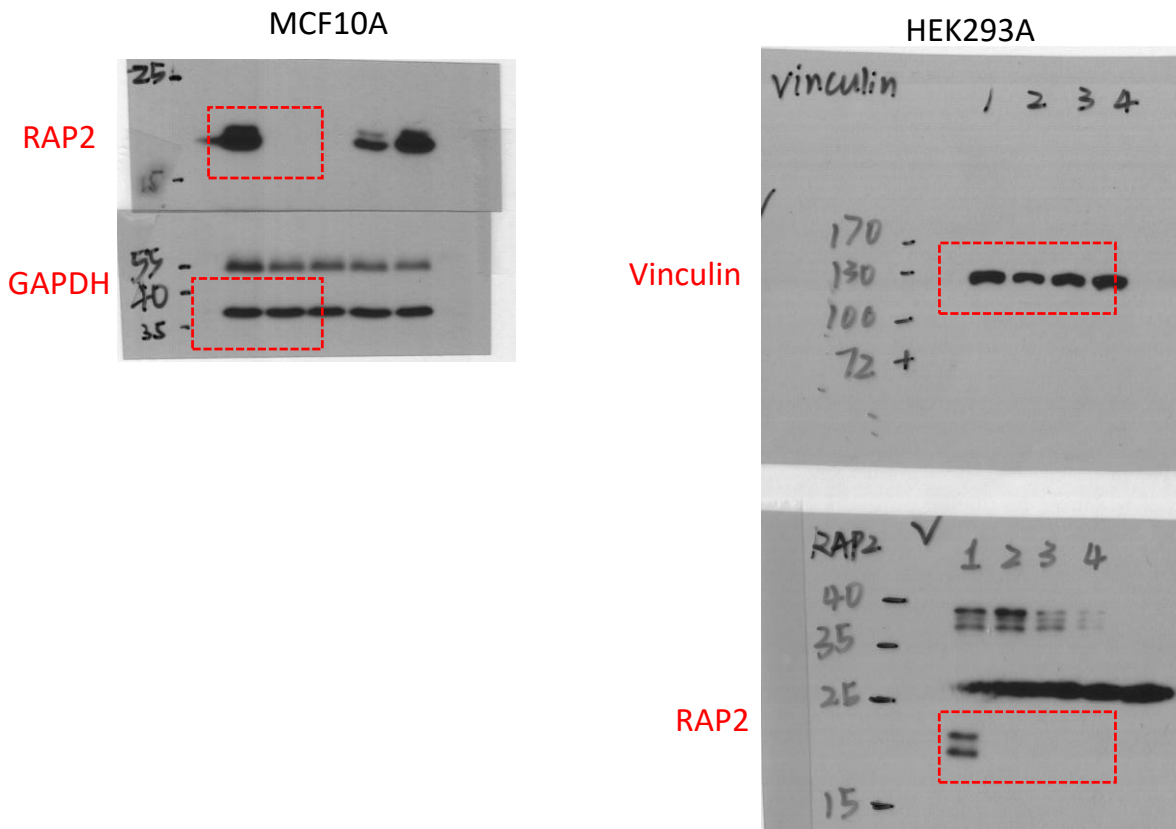

Also EFig. 6b

Fig. 2

a

RAP2 - pull-down experiments.

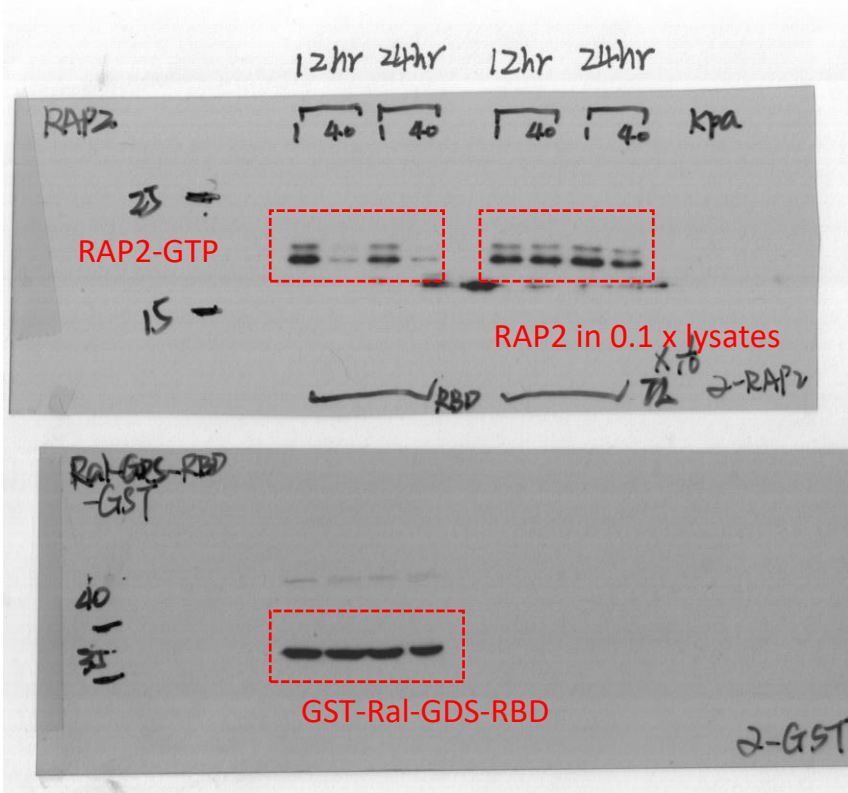

d

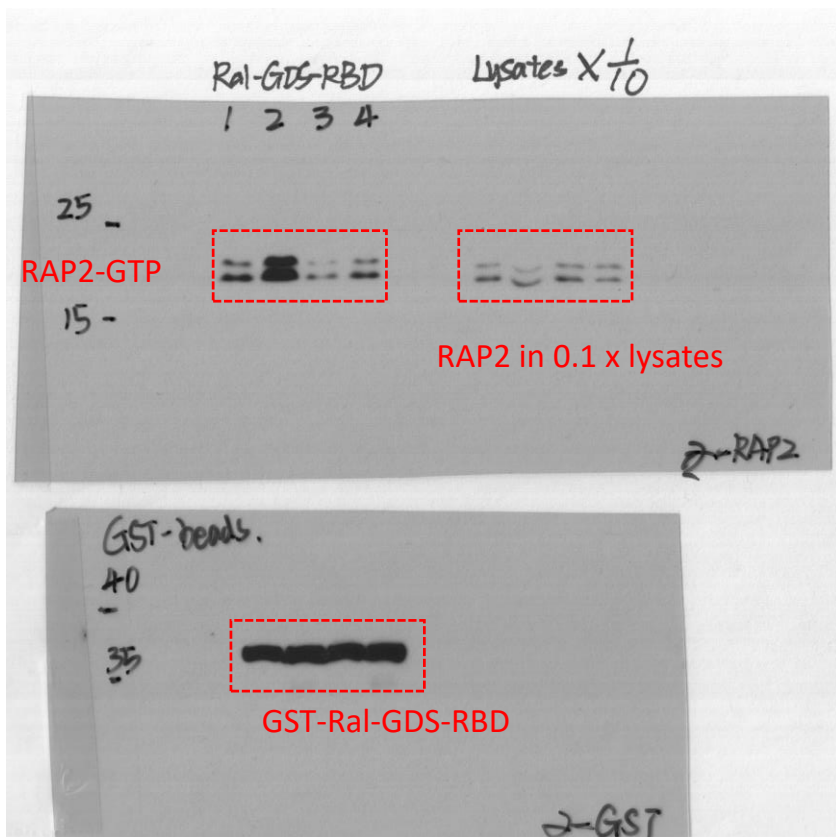

Fig. 3

a

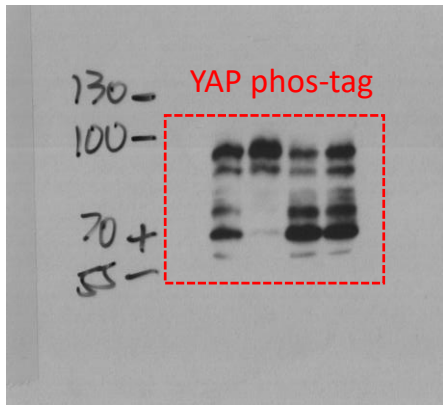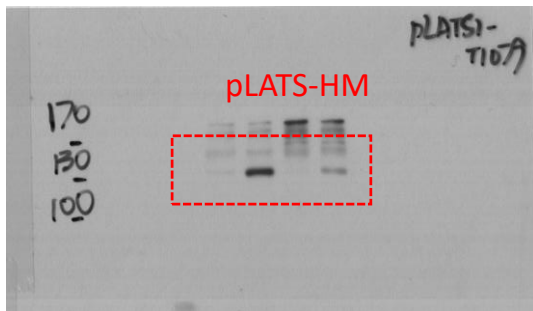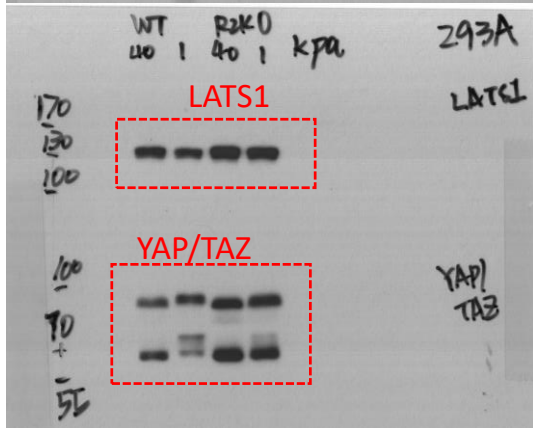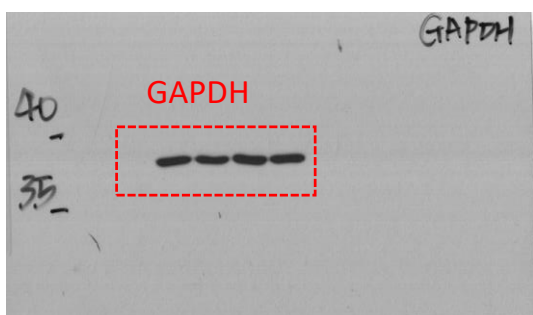

b

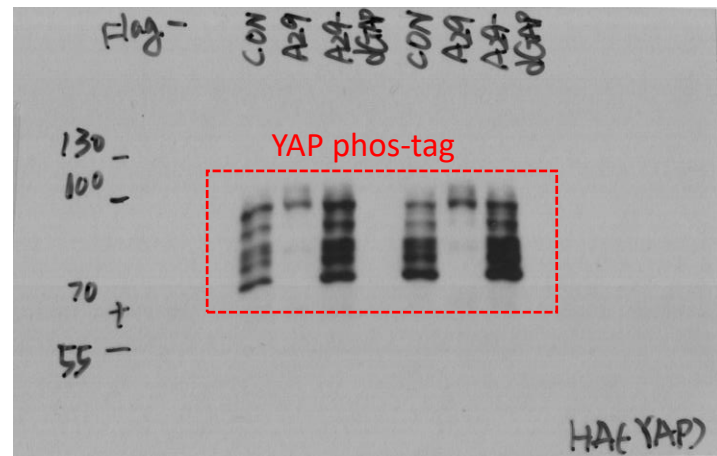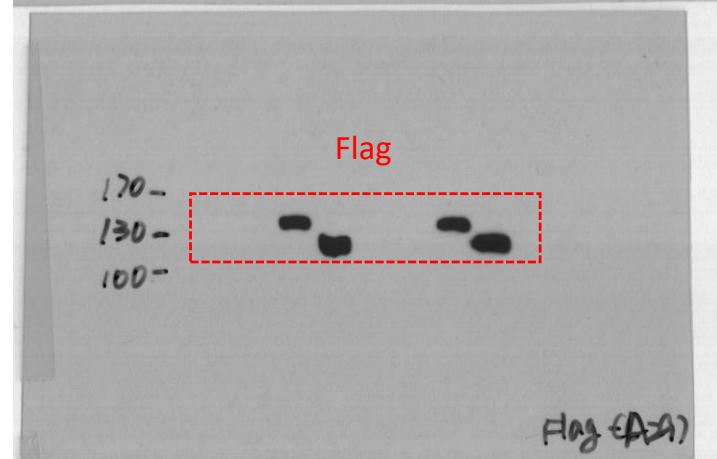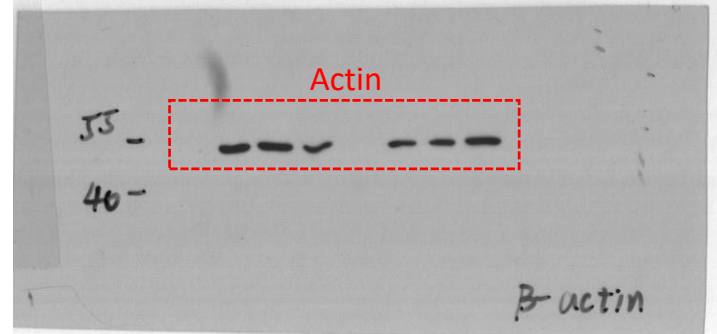

EFig. 1

b

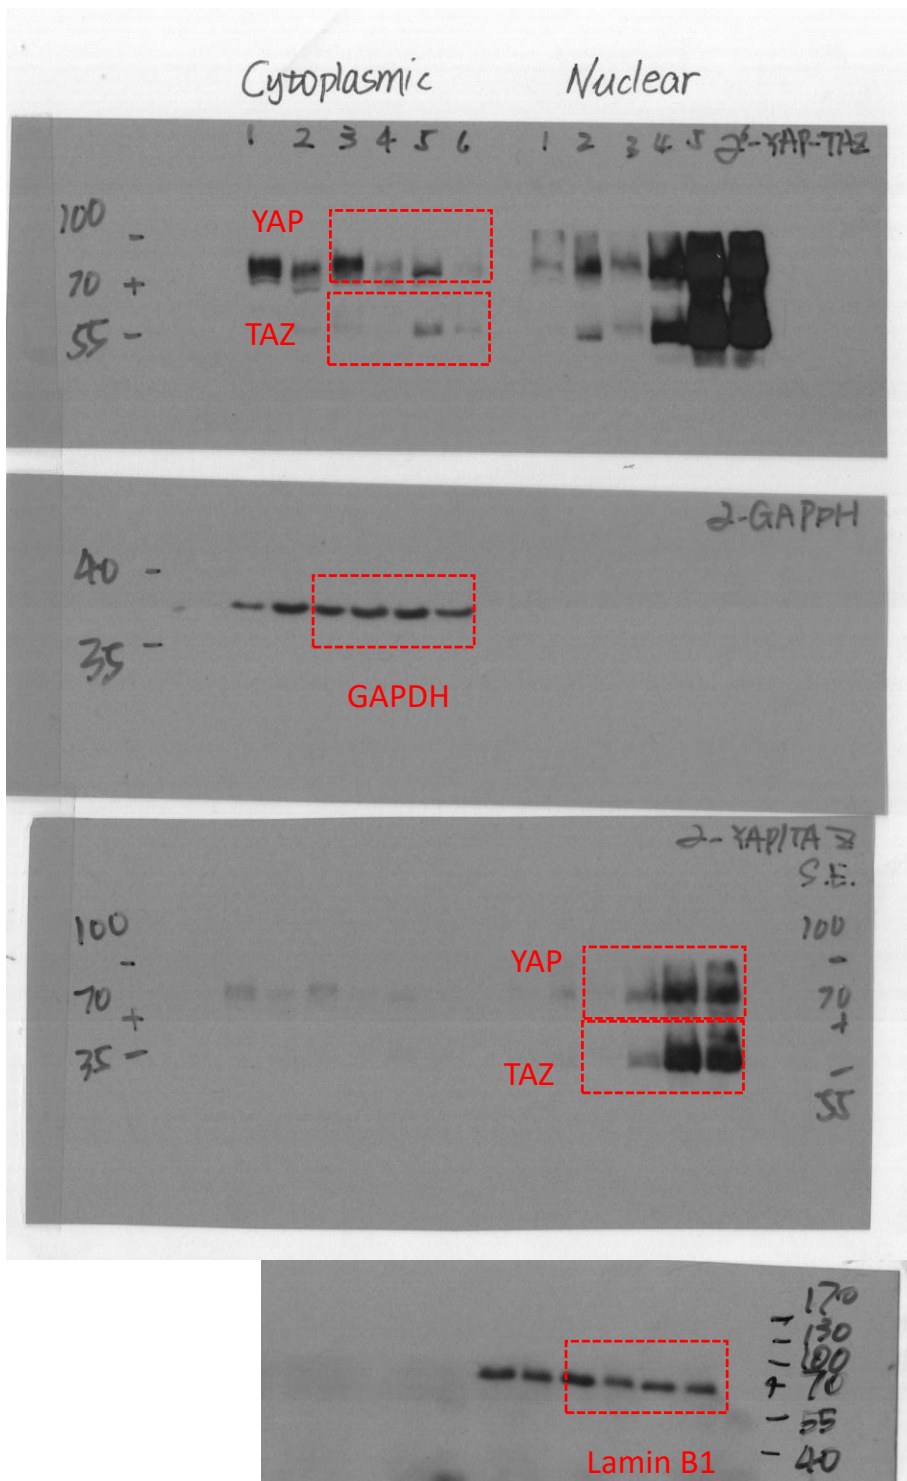

EFig. 1

c

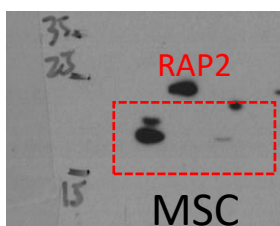

h

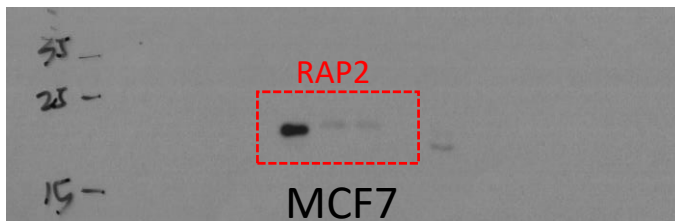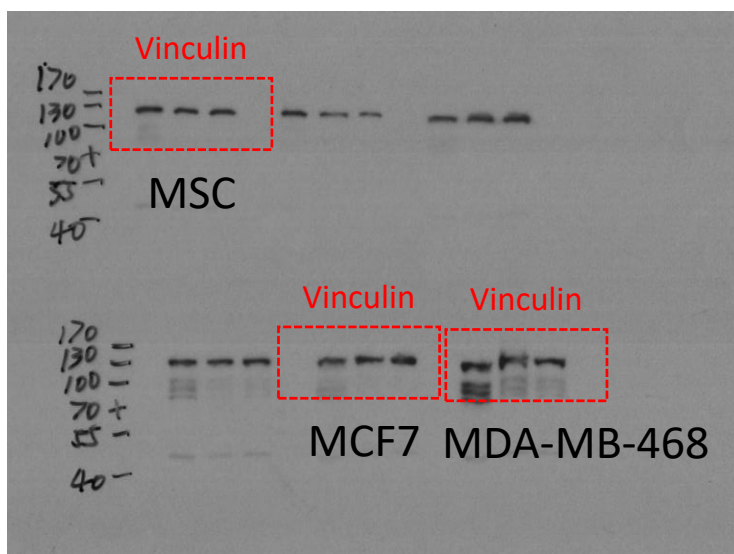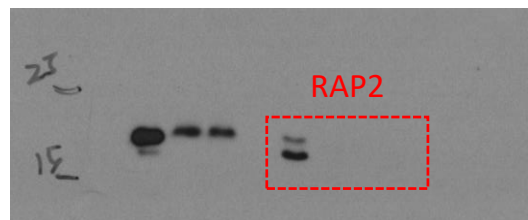

MDA-MB-468

EFig. 2

b

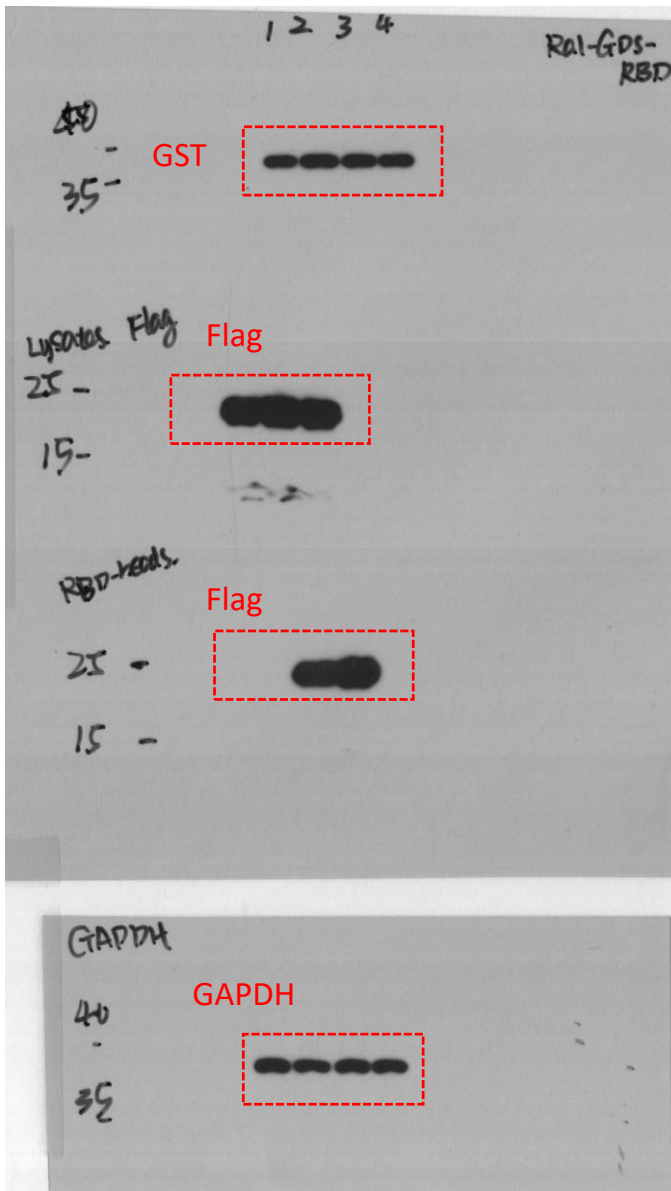

d

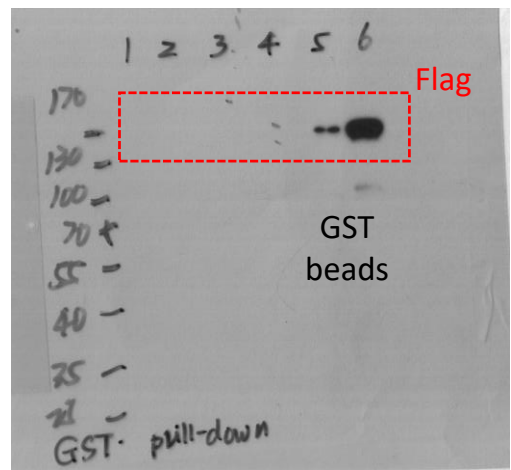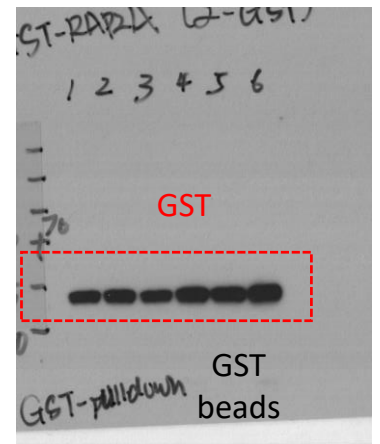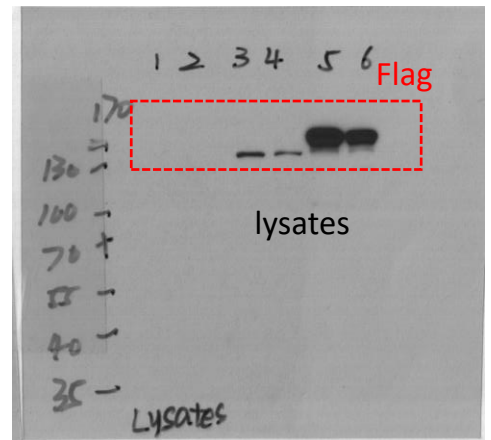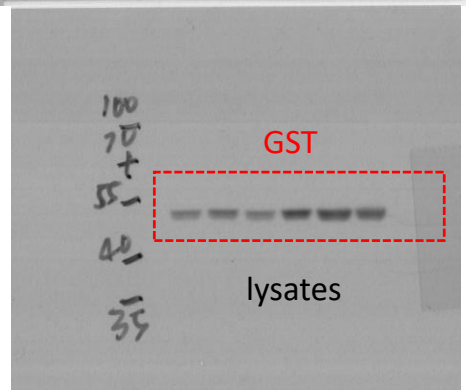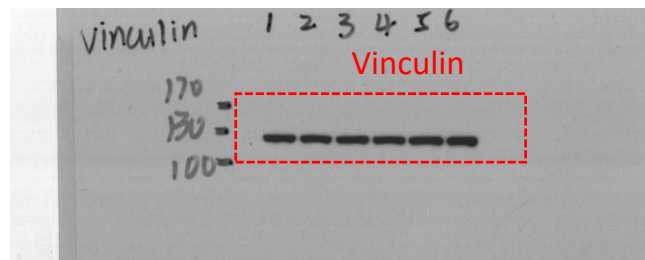

f

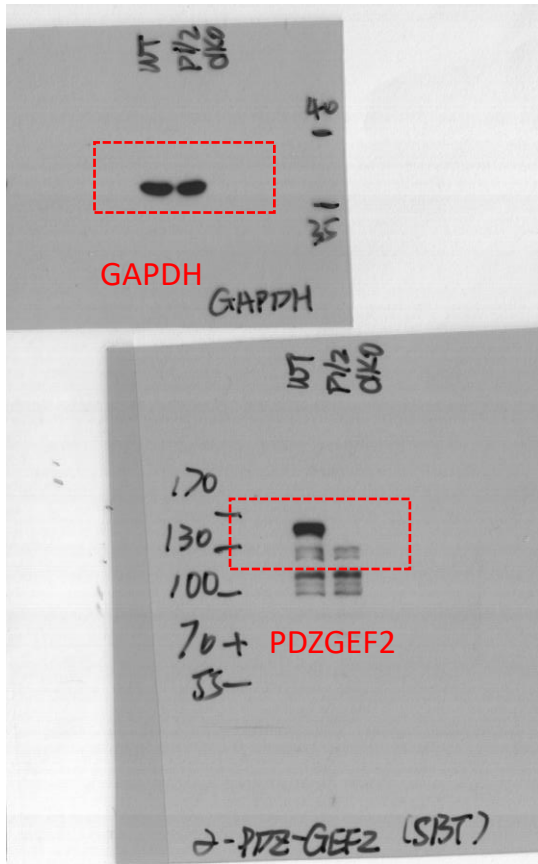

EFig. 3

a

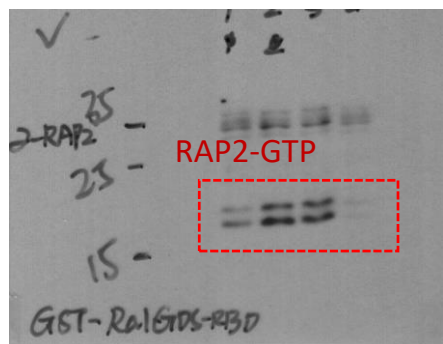

d

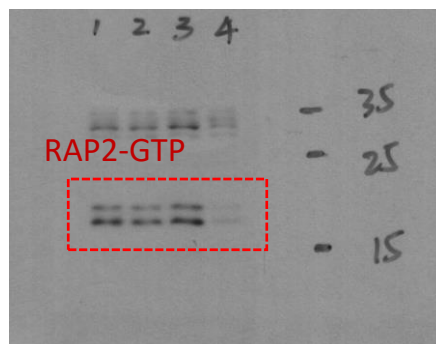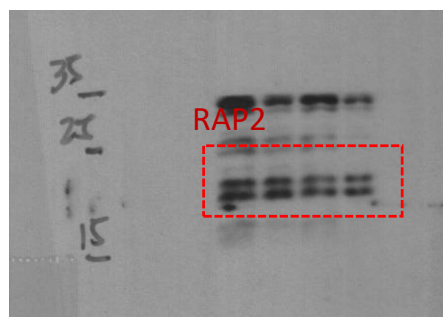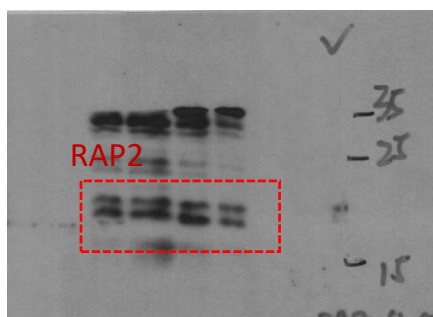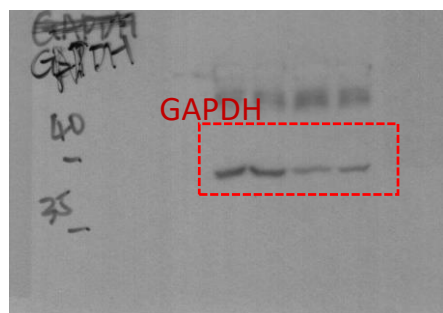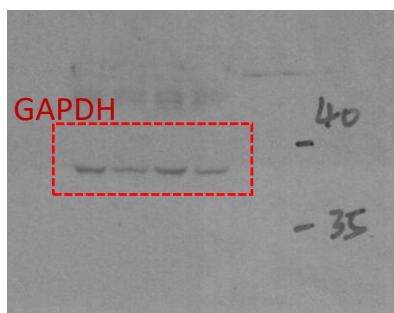



g

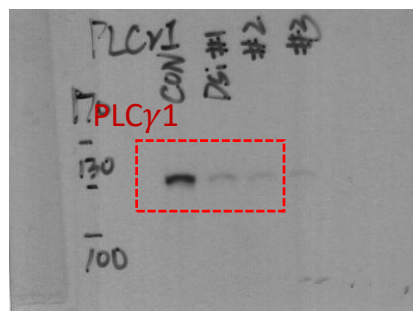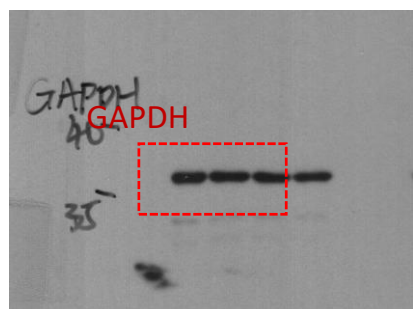

j

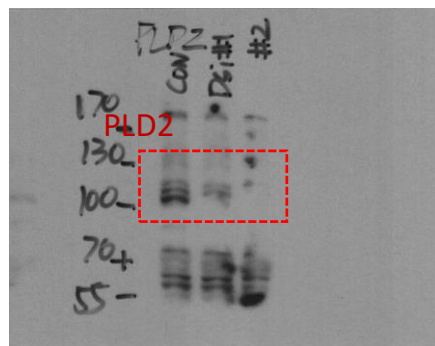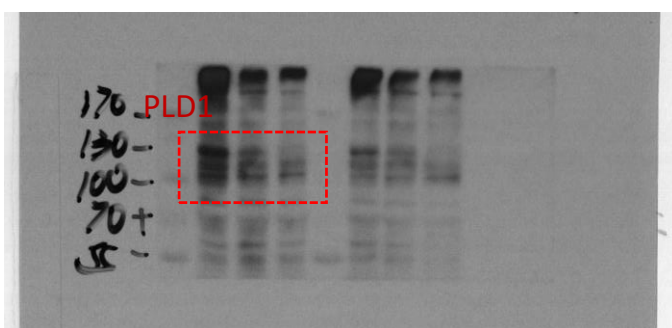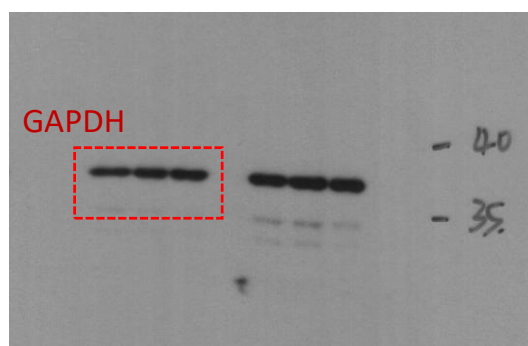

EFig. 3

m

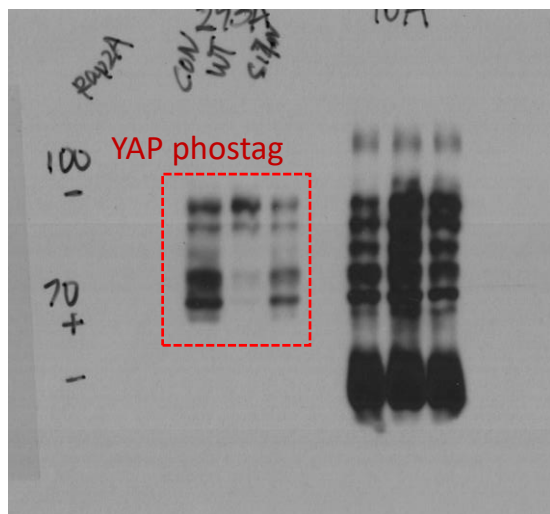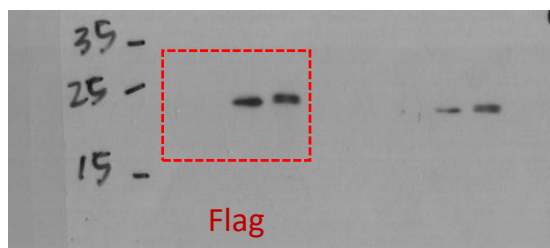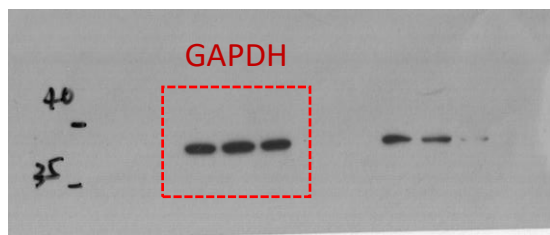

EFig. 4

a

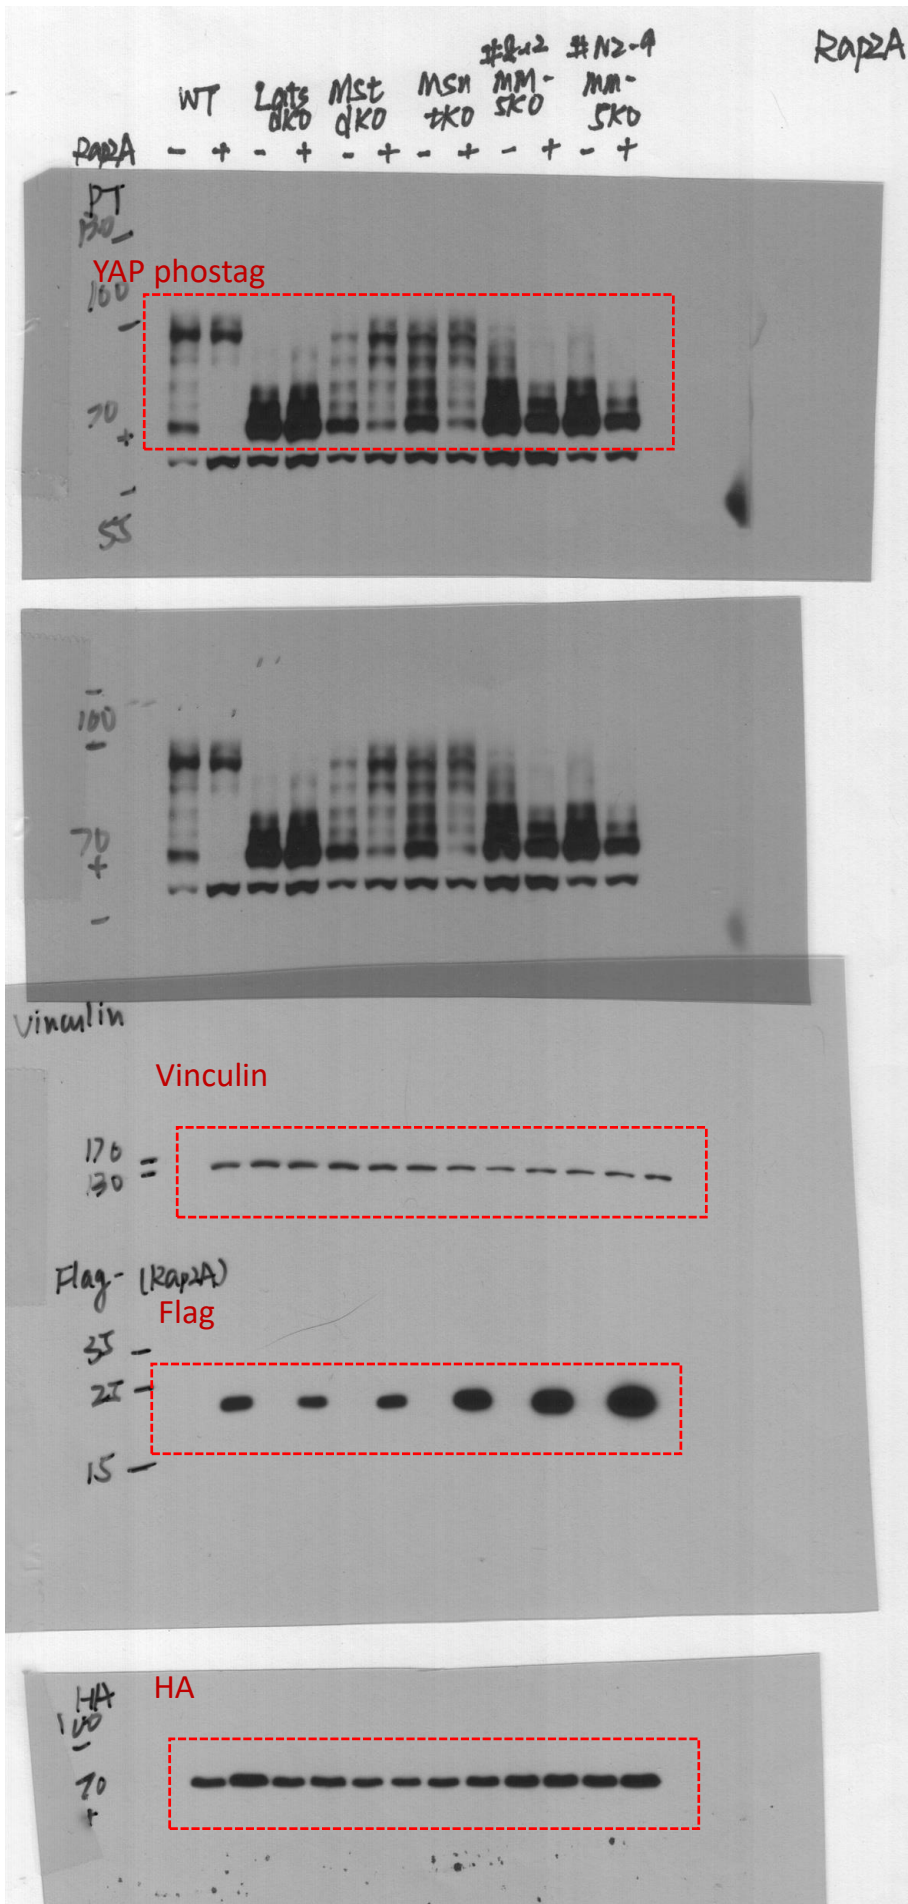

e

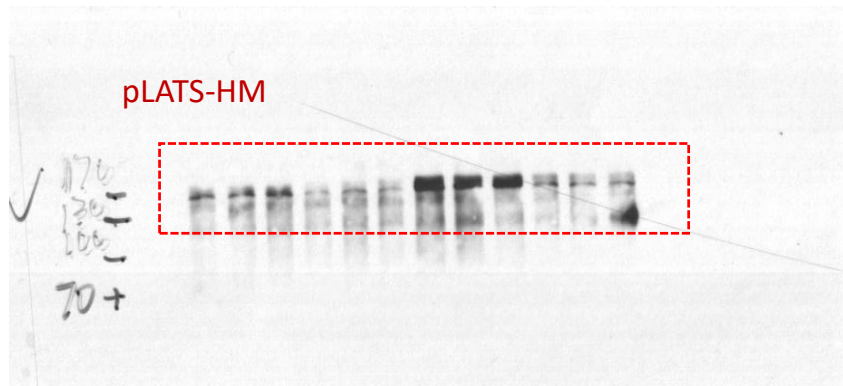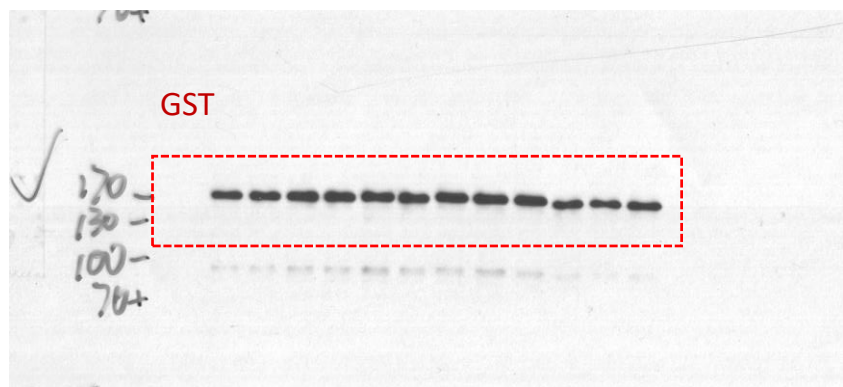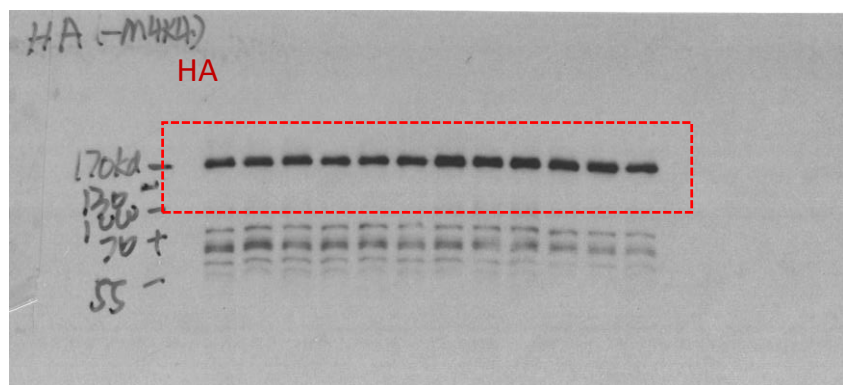

EFig. 4

g

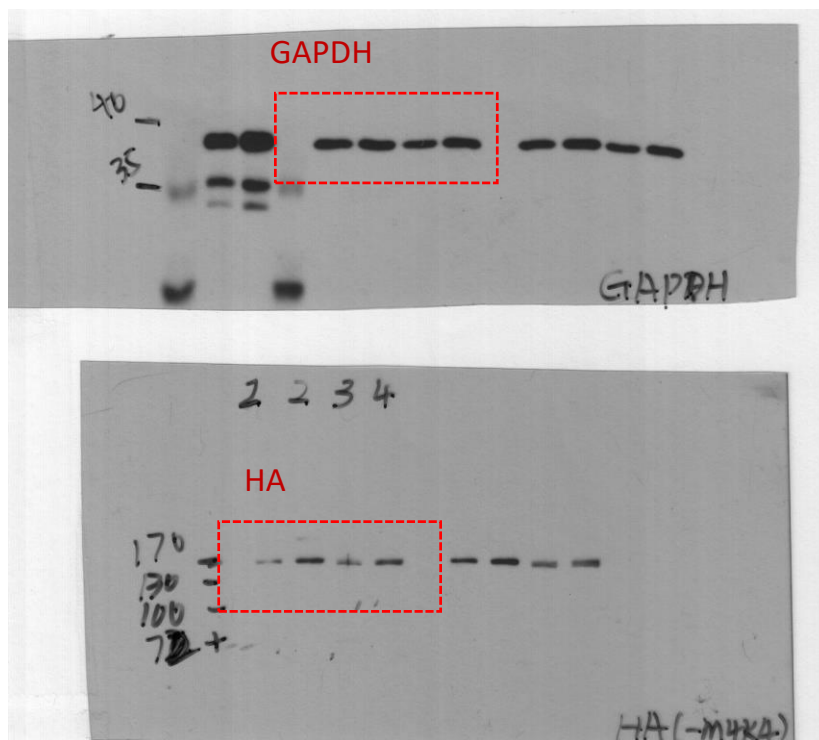

h

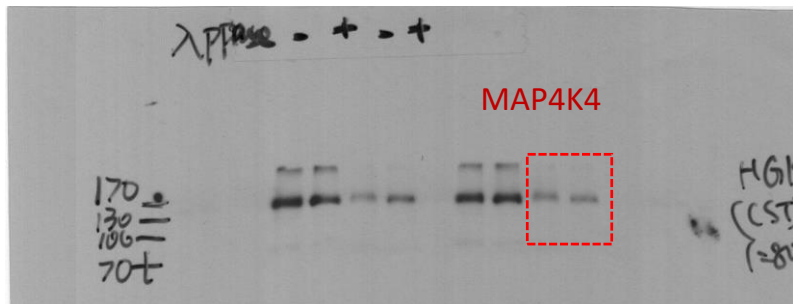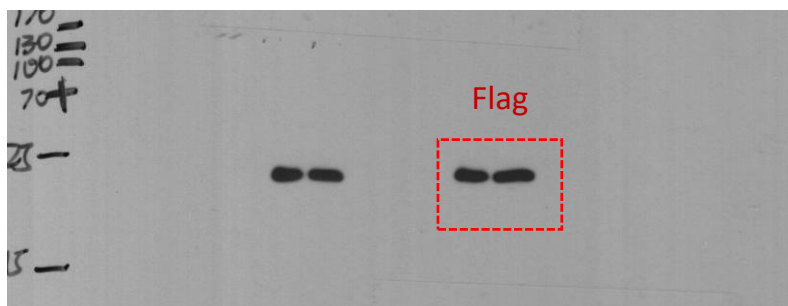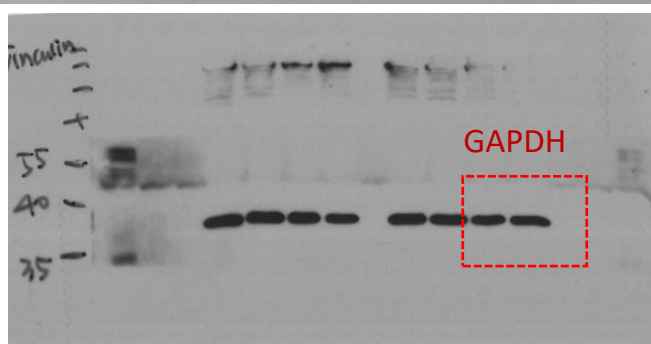

EFig. 4

i

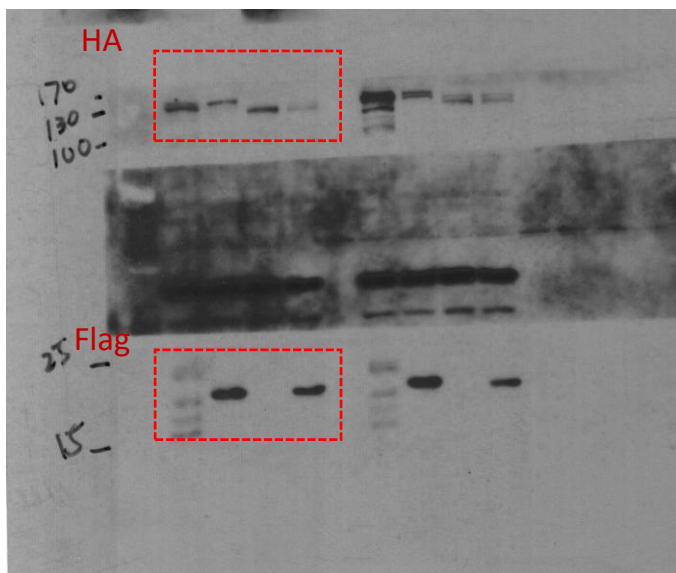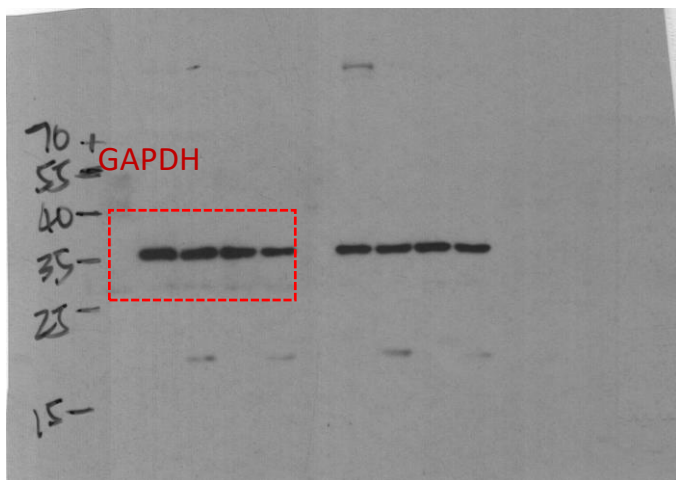

j

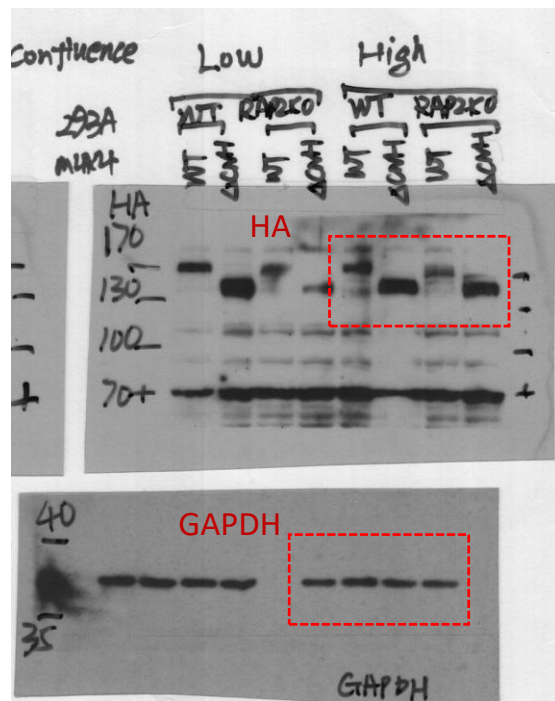

EFig. 5

a

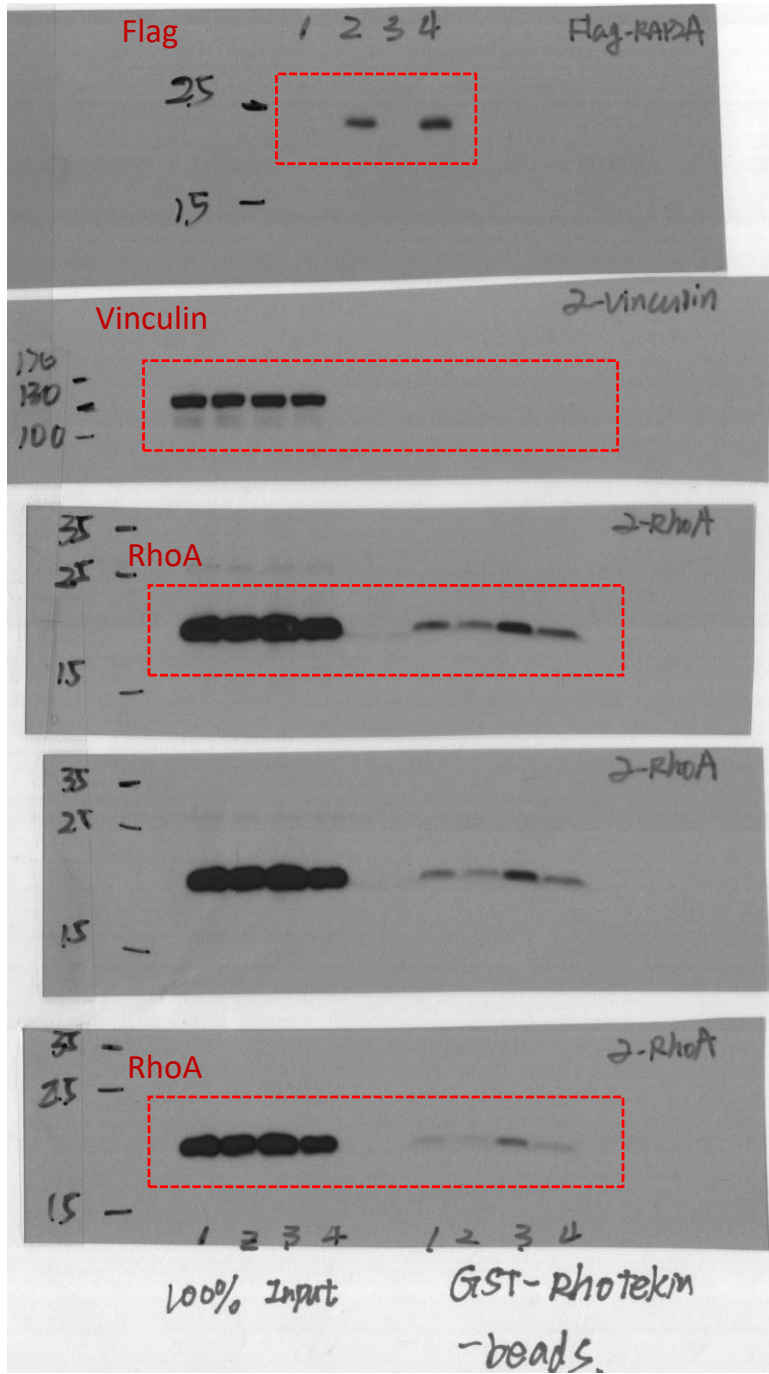

EFig. 5

b

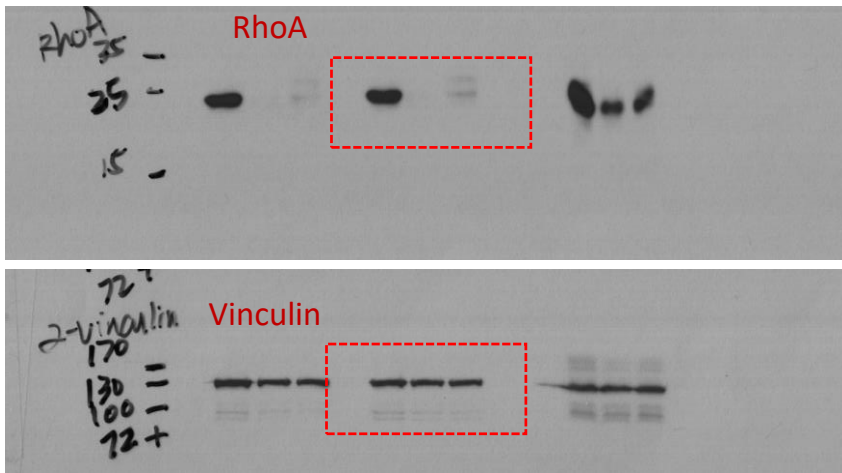

e

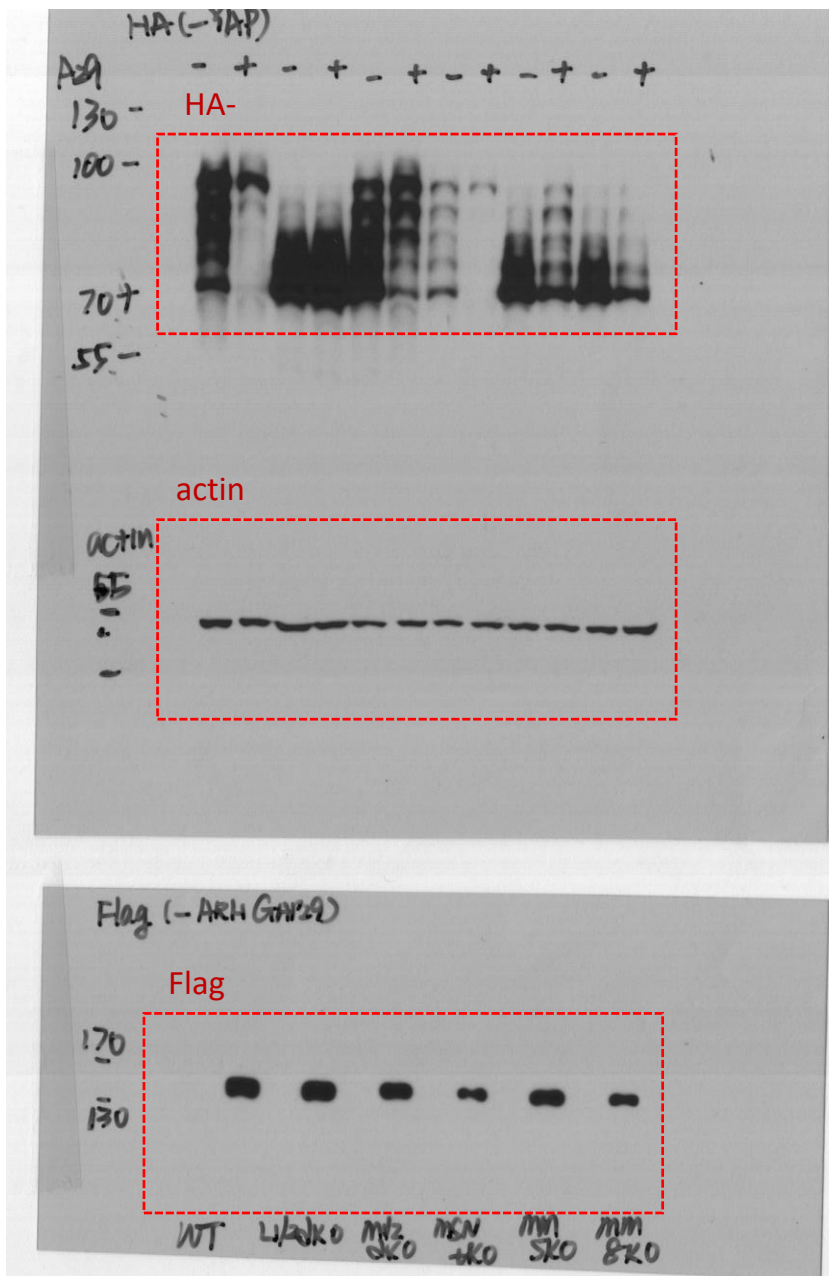



f

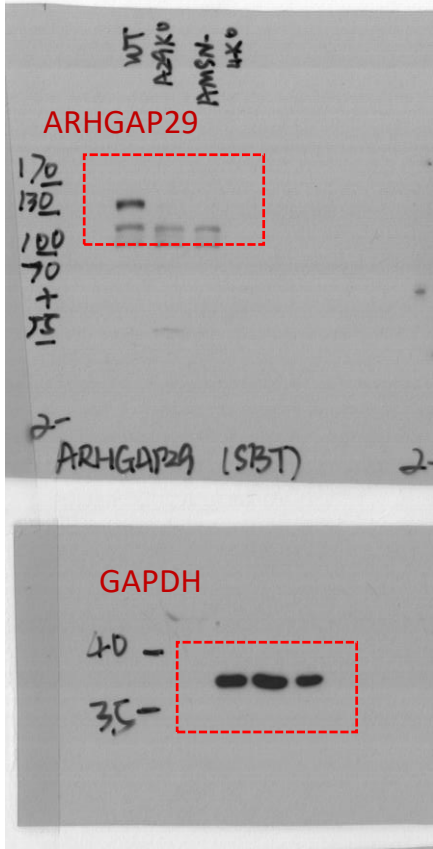

g

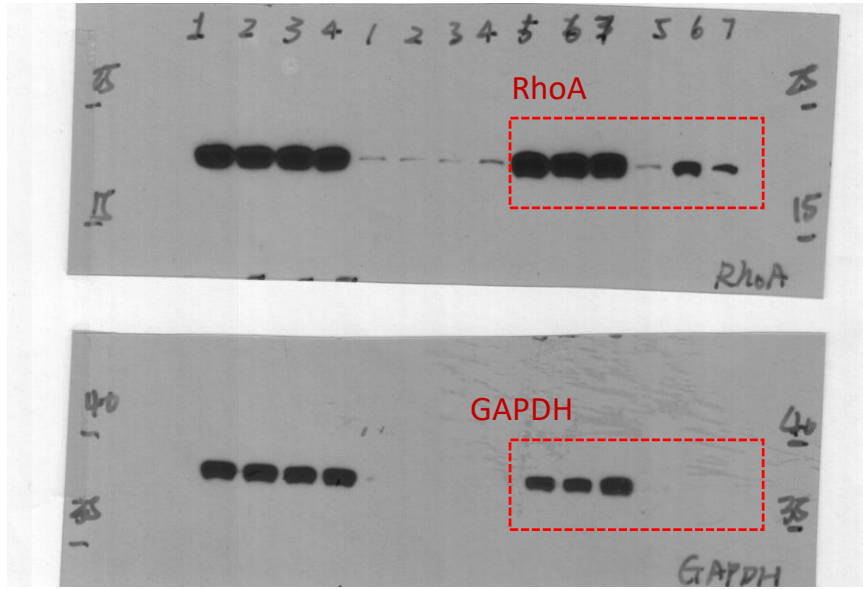

h

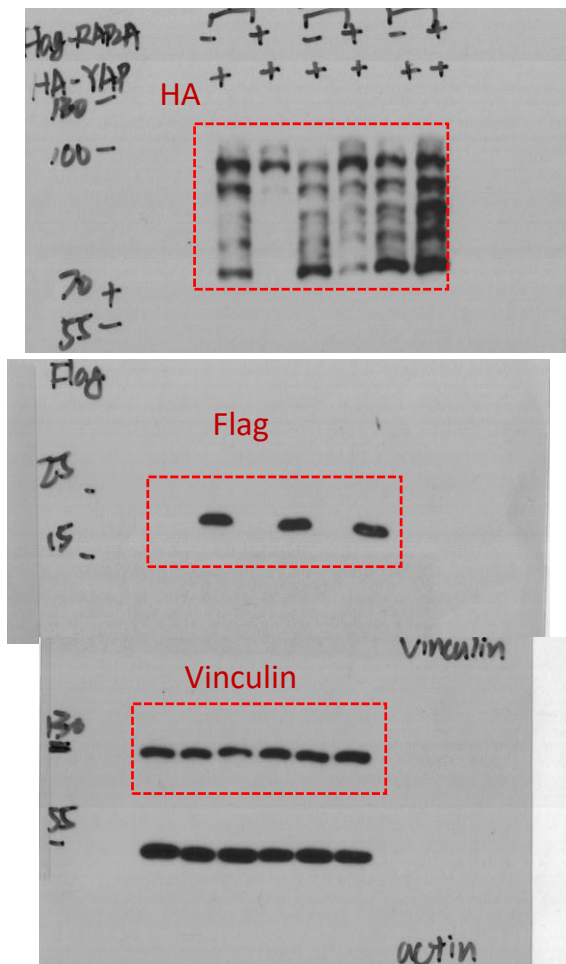

# EFig. 6

C

high confluence

2016-04-19

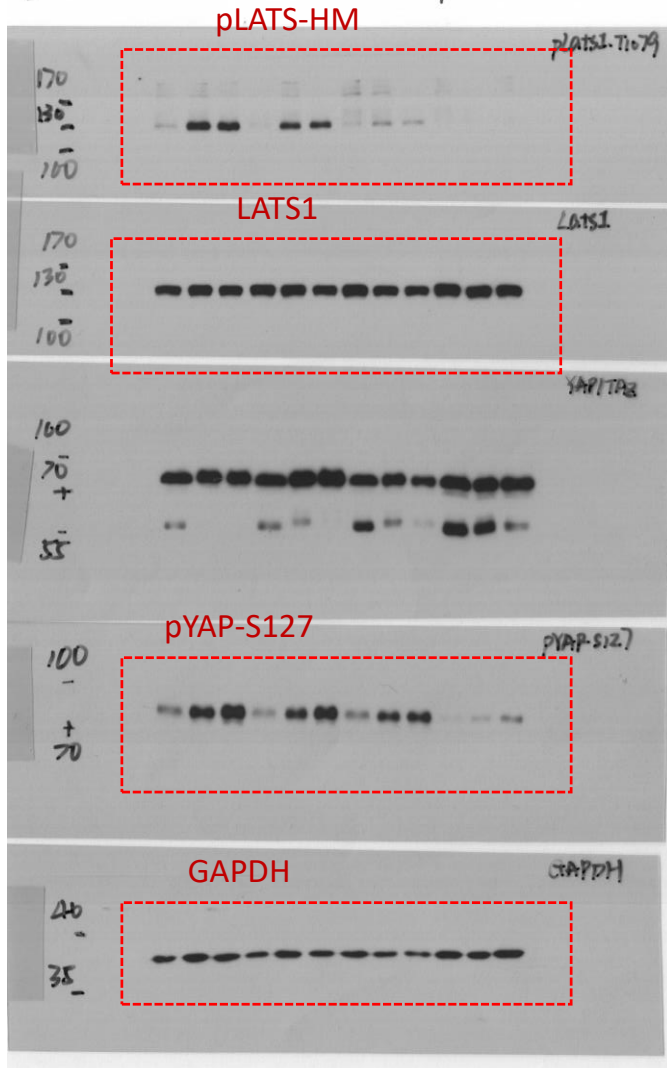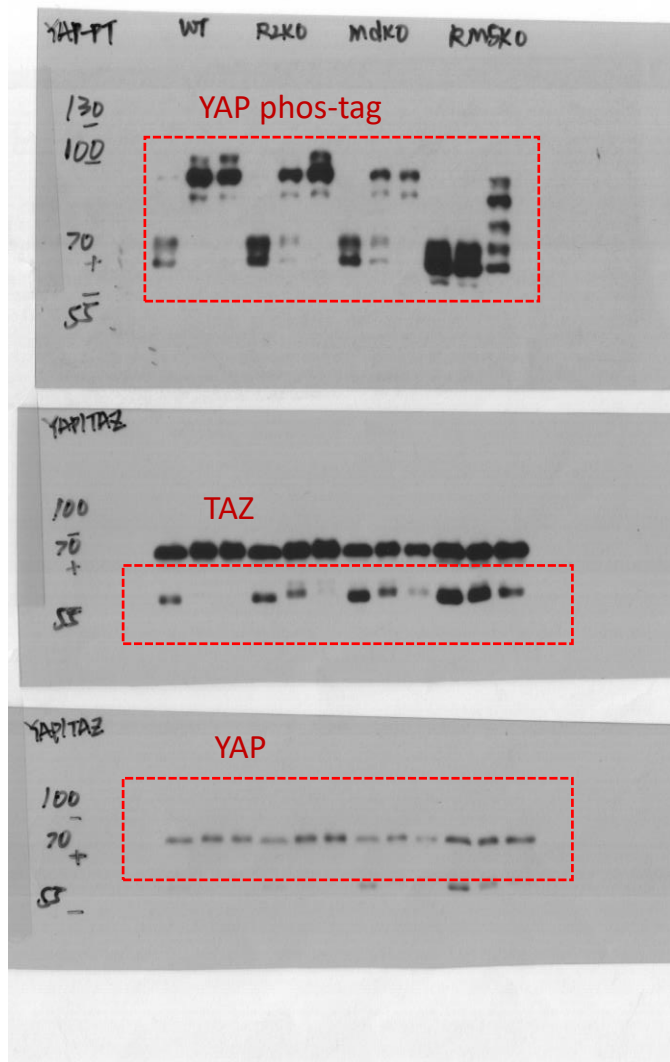

EFig. 6

d

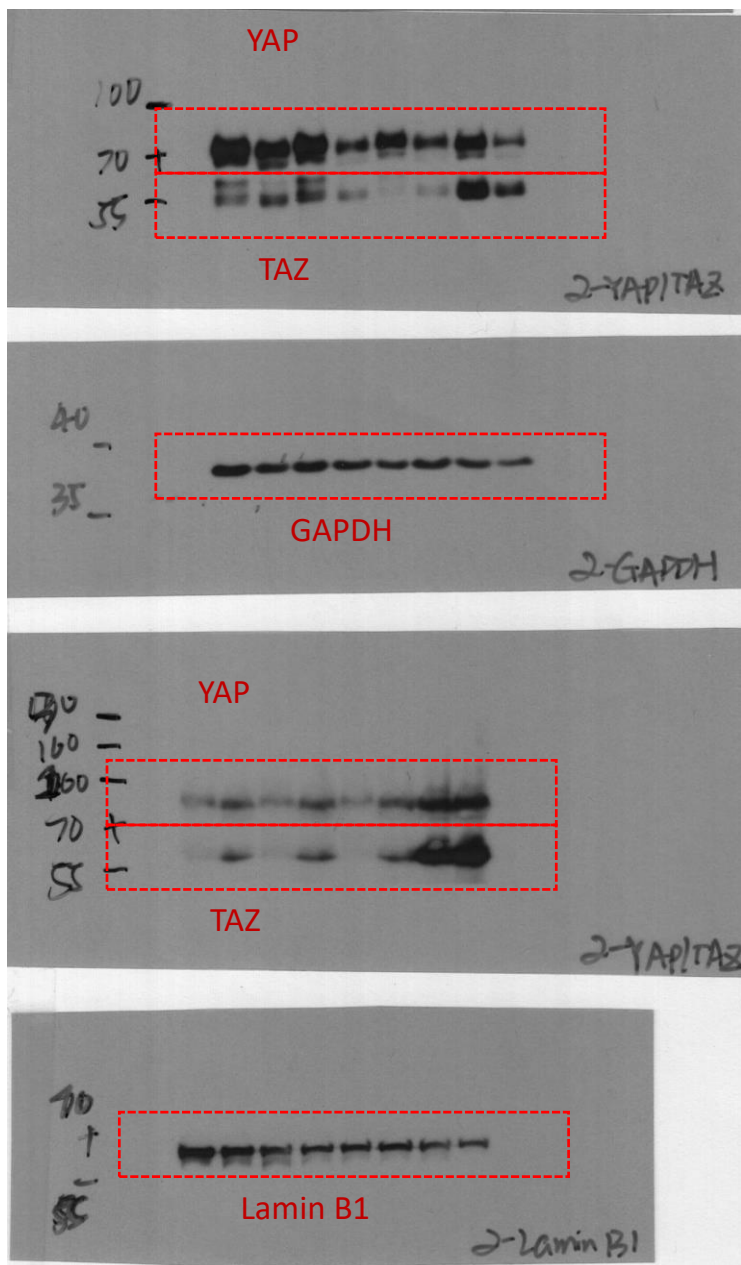

EFig. 7

d

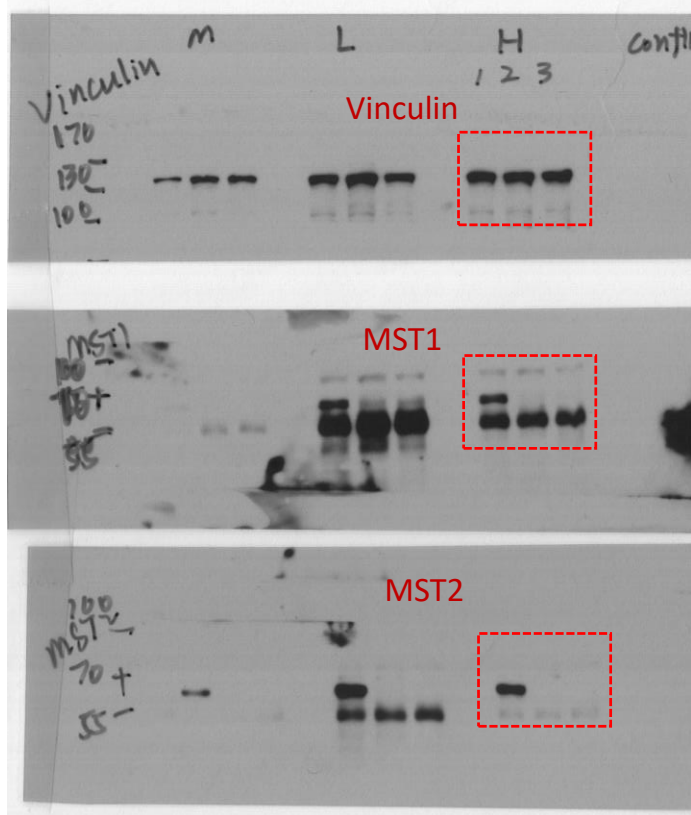

EFig. 8

f

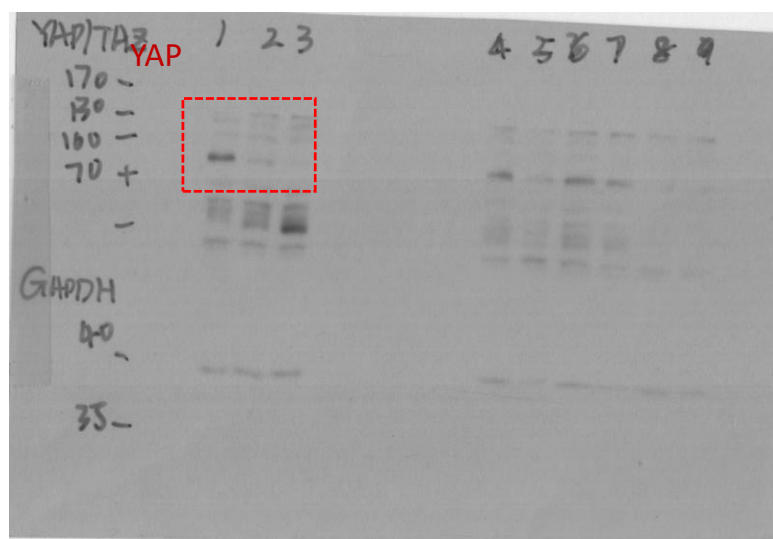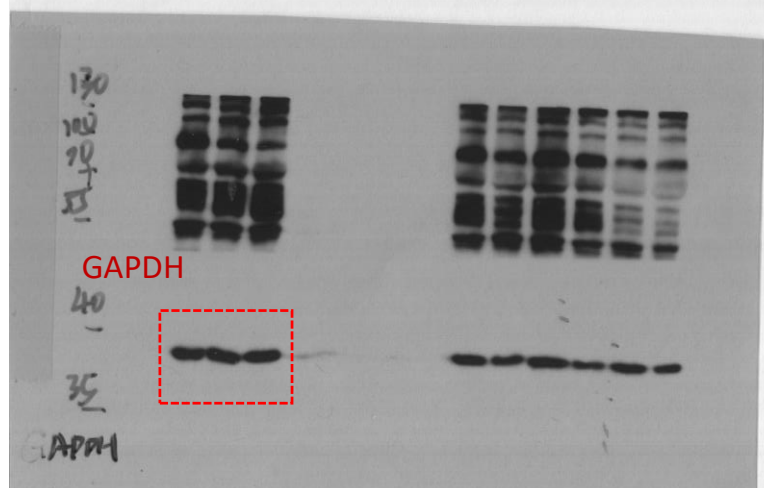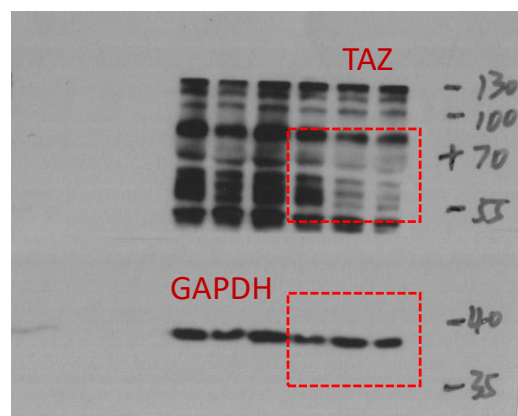

EFig. 7

d



EFig. 8

f

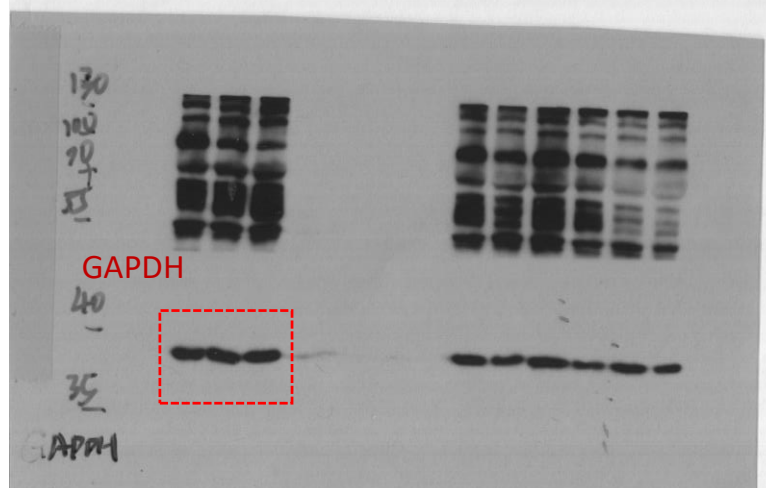

EFig. 8i

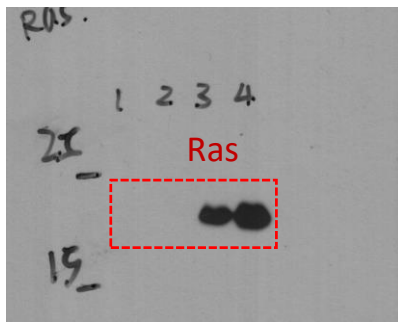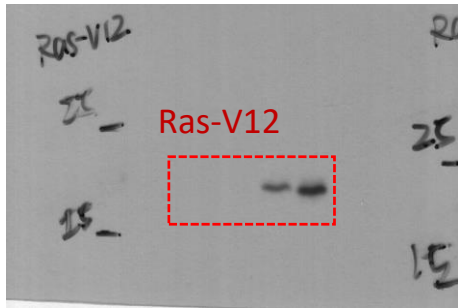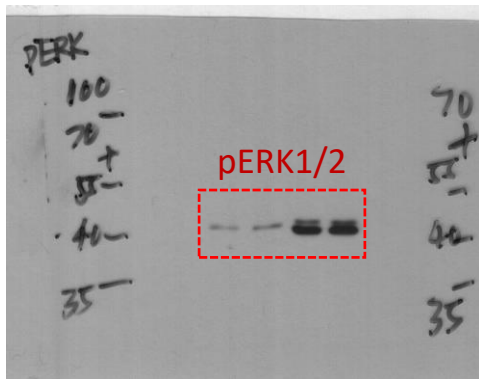

EFig. 9a

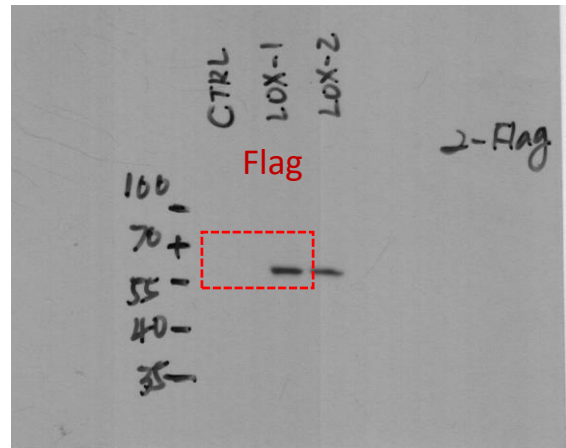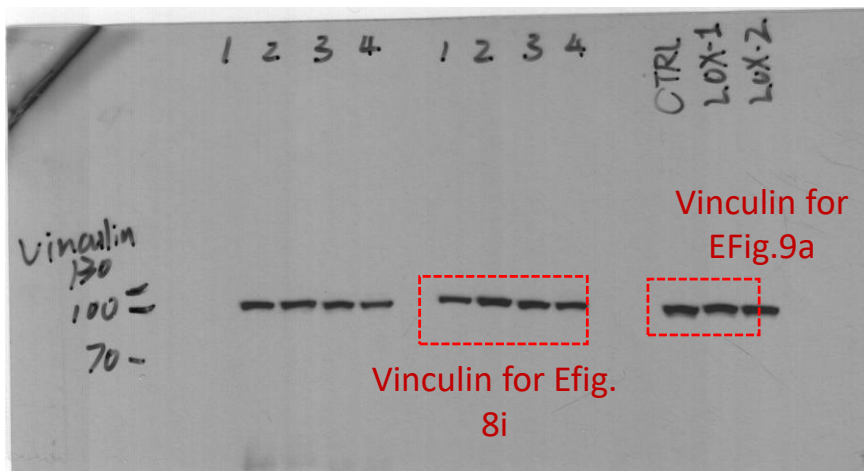

Supplement: NIHMS981560-supplement-1.pdf [file NIHMS981560-supplement-1.pdf]
