# Supplementary material
Source: PubMed Central journal article supplement (PMC6128698)
Supplement: NIHMS981560-supplement-2.pdf [file NIHMS981560-supplement-2.pdf]

Table 1. Small GTPase screening for YAP/TAZ localization regulators  
(related to Fig. 1a)

| ID | GTPase    | Mutant | Family | Tag  | High Stiffness             | Low Stiffness                  |
|----|-----------|--------|--------|------|----------------------------|--------------------------------|
| 1  | ARF1      | WT     | ARF    | Myc  | Nuclear; similar with Ctrl | Cytoplasmic; similar with Ctrl |
| 2  | ARF3      | WT     | ARF    | Myc  | Nuclear; similar with Ctrl | Cytoplasmic; similar with Ctrl |
| 3  | ARF6      | WT     | ARF    | Myc  | Nuclear; similar with Ctrl | Cytoplasmic; similar with Ctrl |
| 4  | ARF6      | QL     | ARF    | Myc  | Nuclear; similar with Ctrl | Cytoplasmic; similar with Ctrl |
| 5  | RAB1A     | WT     | RAB    | HA   | Nuclear; similar with Ctrl | Cytoplasmic; similar with Ctrl |
| 6  | RAB1A     | QL     | RAB    | HA   | Nuclear; similar with Ctrl | Cytoplasmic; similar with Ctrl |
| 7  | RAB5      | WT     | RAB    | HA   | Nuclear; similar with Ctrl | Cytoplasmic; similar with Ctrl |
| 8  | RAB5      | QL     | RAB    | HA   | Nuclear; similar with Ctrl | Cytoplasmic; similar with Ctrl |
| 9  | RAB7      | QL     | RAB    | Myc  | Nuclear; similar with Ctrl | Cytoplasmic; similar with Ctrl |
| 10 | RAB8      | WT     | RAB    | GFP  | Nuclear; similar with Ctrl | Cytoplasmic; similar with Ctrl |
| 11 | RAB8      | QL     | RAB    | GFP  | Nuclear; similar with Ctrl | Cytoplasmic; similar with Ctrl |
| 12 | RAB10     | WT     | RAB    | HA   | Nuclear; similar with Ctrl | Cytoplasmic; similar with Ctrl |
| 13 | RAB10     | QL     | RAB    | HA   | Nuclear; similar with Ctrl | Cytoplasmic; similar with Ctrl |
| 14 | RAB11     | WT     | RAB    | HA   | Nuclear; similar with Ctrl | Cytoplasmic; similar with Ctrl |
| 15 | RAB11     | QL     | RAB    | HA   | Nuclear; similar with Ctrl | Cytoplasmic; similar with Ctrl |
| 16 | RAB22     | WT     | RAB    | Myc  | Nuclear; similar with Ctrl | Cytoplasmic; similar with Ctrl |
| 17 | RAB22     | QL     | RAB    | Myc  | Nuclear; similar with Ctrl | Cytoplasmic; similar with Ctrl |
| 18 | RHOA      | L63    | RHO    | Myc  | Nuclear; similar with Ctrl | Cytoplasmic; similar with Ctrl |
| 19 | RAC1      | L61    | RHO    | Myc  | Nuclear; similar with Ctrl | Cytoplasmic; similar with Ctrl |
| 20 | CDC42     | L61    | RHO    | Myc  | Nuclear and cytoplasmic    | Cytoplasmic; similar with Ctrl |
| 21 | RAN       | WT     | RAN    | HA   | Nuclear; similar with Ctrl | Cytoplasmic; similar with Ctrl |
| 22 | RAN       | QL     | RAN    | HA   | Nuclear; similar with Ctrl | Cytoplasmic; similar with Ctrl |
| 24 | RAGA-RAGC | QL-SN  | RAS    | HA   | Nuclear; similar with Ctrl | Cytoplasmic; similar with Ctrl |
| 25 | RHEB      | QL     | RAS    | Myc  | Nuclear; similar with Ctrl | Cytoplasmic; similar with Ctrl |
| 26 | RALA      | WT     | RAS    | GFP  | Nuclear and cytoplasmic    | Cytoplasmic; similar with Ctrl |
| 27 | RALB      | WT     | RAS    | RFP  | Nuclear; similar with Ctrl | Cytoplasmic; similar with Ctrl |
| 28 | RALB      | QL     | RAS    | RFP  | Nuclear; similar with Ctrl | Cytoplasmic; similar with Ctrl |
| 29 | HRAS      | V12    | RAS    | HA   | Nuclear; similar with Ctrl | Cytoplasmic; similar with Ctrl |
| 30 | KRAS      | V12    | RAS    | HA   | Nuclear; similar with Ctrl | Cytoplasmic; similar with Ctrl |
| 31 | NRAS      | V12    | RAS    | HA   | Nuclear; similar with Ctrl | Cytoplasmic; similar with Ctrl |
| 32 | RAP1B     | V12    | RAS    | Flag | Nuclear; similar with Ctrl | Cytoplasmic; similar with Ctrl |
| 33 | RAP2A     | V12    | RAS    | HA   | Cytosolic                  | More cytoplasmic than Ctrl     |

Table 2. Gene ontology analysis of gene regulated by ECM stiffness (related to Fig. 4i)

| Term                                                           | Count | Percentage | P-value  | Fold Enrichment | Benjamini |
|----------------------------------------------------------------|-------|------------|----------|-----------------|-----------|
| regulation of gene expression                                  | 121   | 26.48      | 2.81E-06 | 1.45            | 1.08E-02  |
| regulation of nitrogen compound metabolic process              | 122   | 26.70      | 3.25E-06 | 1.45            | 6.29E-03  |
| cell projection organization                                   | 50    | 10.94      | 3.43E-06 | 2.01            | 4.43E-03  |
| regulation of nucleobase-containing compound metabolic process | 115   | 25.16      | 4.51E-06 | 1.46            | 4.37E-03  |
| regulation of cellular macromolecule biosynthetic process      | 111   | 24.29      | 1.08E-05 | 1.45            | 8.37E-03  |
| regulation of RNA metabolic process                            | 105   | 22.98      | 1.92E-05 | 1.46            | 1.24E-02  |
| regulation of nucleic acid-templated transcription             | 102   | 22.32      | 1.95E-05 | 1.47            | 1.08E-02  |
| regulation of macromolecule biosynthetic process               | 112   | 24.51      | 2.40E-05 | 1.42            | 1.16E-02  |
| regulation of RNA biosynthetic process                         | 102   | 22.32      | 2.44E-05 | 1.46            | 1.05E-02  |
| regulation of transcription, DNA-templated                     | 101   | 22.10      | 2.59E-05 | 1.46            | 1.00E-02  |
| transcription, DNA-templated                                   | 100   | 21.88      | 4.51E-05 | 1.45            | 1.58E-02  |
| nucleic acid-templated transcription                           | 102   | 22.32      | 1.01E-04 | 1.41            | 3.22E-02  |
| myelination                                                    | 10    | 2.19       | 1.16E-04 | 5.27            | 3.40E-02  |
| ensheathment of neurons                                        | 10    | 2.19       | 1.46E-04 | 5.12            | 3.97E-02  |
| axon ensheathment                                              | 10    | 2.19       | 1.46E-04 | 5.12            | 3.97E-02  |
| muscle structure development                                   | 26    | 5.69       | 1.71E-04 | 2.30            | 4.34E-02  |
| RNA biosynthetic process                                       | 103   | 22.54      | 2.48E-04 | 1.38            | 5.84E-02  |
| gene expression                                                | 132   | 28.88      | 2.55E-04 | 1.30            | 5.65E-02  |
| cell projection morphogenesis                                  | 31    | 6.78       | 3.20E-04 | 2.03            | 6.66E-02  |
| nervous system development                                     | 64    | 14.00      | 3.99E-04 | 1.54            | 7.84E-02  |
| neurogenesis                                                   | 47    | 10.28      | 4.15E-04 | 1.70            | 7.74E-02  |
| regulation of transcription from RNA polymerase II promoter    | 56    | 12.25      | 4.66E-04 | 1.59            | 8.25E-02  |
| cell part morphogenesis                                        | 31    | 6.78       | 4.85E-04 | 1.98            | 8.21E-02  |
| nucleobase-containing compound biosynthetic process            | 111   | 24.29      | 4.86E-04 | 1.33            | 7.88E-02  |
| heterocycle biosynthetic process                               | 112   | 24.51      | 5.12E-04 | 1.33            | 7.96E-02  |
| aromatic compound biosynthetic process                         | 112   | 24.51      | 5.75E-04 | 1.32            | 8.55E-02  |

Table 3. Gene ontology analysis of genes regulated by ECM, Hippo pathway and RAP2 (related to Extended Data Fig. 10g,h)

| Term                                                     | Count | Percentage | P-value  | Fold Enrichment | Benjamini |
|----------------------------------------------------------|-------|------------|----------|-----------------|-----------|
| cell adhesion                                            | 44    | 24.58      | 4.91E-10 | 2.78            | 1.63E-06  |
| biological adhesion                                      | 44    | 24.58      | 5.48E-10 | 2.77            | 9.12E-07  |
| circulatory system development                           | 26    | 14.53      | 1.85E-06 | 2.96            | 2.05E-03  |
| cardiovascular system development                        | 26    | 14.53      | 1.85E-06 | 2.96            | 2.05E-03  |
| cell-cell adhesion                                       | 29    | 16.20      | 2.64E-06 | 2.68            | 2.19E-03  |
| vasculature development                                  | 20    | 11.17      | 3.66E-06 | 3.52            | 2.44E-03  |
| growth                                                   | 25    | 13.97      | 4.85E-06 | 2.88            | 2.69E-03  |
| blood vessel development                                 | 19    | 10.61      | 6.43E-06 | 3.54            | 3.06E-03  |
| anatomical structure formation involved in morphogenesis | 28    | 15.64      | 6.52E-06 | 2.61            | 2.71E-03  |
| hippo signaling                                          | 6     | 3.35       | 1.22E-05 | 19.53           | 4.51E-03  |
| actin cytoskeleton organization                          | 18    | 10.06      | 1.46E-05 | 3.50            | 4.86E-03  |
| cell development                                         | 38    | 21.23      | 1.69E-05 | 2.07            | 5.10E-03  |
| tissue morphogenesis                                     | 19    | 10.61      | 1.82E-05 | 3.28            | 5.03E-03  |
| cell morphogenesis involved in differentiation           | 21    | 11.73      | 2.10E-05 | 3.00            | 5.35E-03  |
| cell-substrate adhesion                                  | 13    | 7.26       | 2.80E-05 | 4.56            | 6.64E-03  |
| angiogenesis                                             | 15    | 8.38       | 3.01E-05 | 3.90            | 6.66E-03  |

Table 4. Antibodies used in the study

| <b>Gene</b>      | <b>Usage</b> | <b>Vendor</b>                | <b>Catalog</b> | <b>Dilution</b> |
|------------------|--------------|------------------------------|----------------|-----------------|
| ARHGAP29         | WB           | Santa Cruz Biotechnology     | sc-365554      | 1:400           |
| $\beta$ -catenin | IF           | BD Biosciences               | 610154         | 1:250           |
| pERK1/2          | WB           | Cell Signaling Biotechnology | 4370           | 1:2000          |
| GFP              | IF           | Cell Signaling Biotechnology | 2956           | 1:100           |
| GM130            | IHC          | BD Biosciences               | 610823         | 1:500           |
| HLA class 1      | IHC          | Abcam                        | ab70328        | 1:100           |
| Laminin V        | IHC          | EMD Millipore                | MAB19562X      | 1:1000          |
| PDZGEF2          | WB           | Santa Cruz Biotechnology     | sc-398642      | 1:400           |
| RhoA             | WB           | Cell Signaling Biotechnology | 2117           | 1:1000          |
| Ras              | WB           | Cell Signaling Biotechnology | 3339           | 1:2000          |
| Ras (G12V)       | WB           | Cell Signaling Biotechnology | 14412          | 1:2000          |
| PLCy1            | WB           | Cell Signaling Biotechnology | 5690           | 1:1000          |
| PLD1             | WB           | R&D systems                  | F5615-SP       | 1:1000          |
| PLD2             | WB           | Cell Signaling Biotechnology | 13904          | 1:1000          |
| RAP2             | WB           | BD Biosciences               | 610215         | 1:1000          |
| TWIST            | IF           | Santa Cruz Biotechnology     | sc-81417       | 1:100           |
| YAP/TAZ          | IHC          | Cell Signaling Biotechnology | 8418           | 1:100           |

Other antibodies used in this study were described elsewhere (ref 17).
